# Supplementary material
Source: MDPI journal article supplement (https://www.mdpi.com/2227-9717/11/7/2220)
Supplement: s1 [file s1]

# Acetalization of alkyl alcohols with benzaldehyde with alkyl alcohols over cesium phosphomolybdovanate salts

MÁRCIO JOSÉ DA SILVA<sup>1\*</sup>, CLÁUDIO JUNIOR ANDRADE RIBEIRO<sup>2</sup>, AND ISADORA MERIGHI TORTELOTI<sup>1</sup>

<sup>1</sup>*Chemistry Department, Federal University of Viçosa, Viçosa, Minas Gerais, Brasil. zip-code: 36590-000*

<sup>2</sup>*Chemistry Department, Federal Institute of Education, Science and Technology of Minas Gerais, São João Evangelista, Minas Gerais, Brasil. zip-code: 39705-000*

## SUPPLEMENTAL MATERIAL

### List of Figures

**Figure S1.** . Unsubstituted cesium phosphomolybdate (first), and containing 1(second), 2 (third), or 3 (fourth) vanadium atoms mol/ mol of heteropolyanion.

**Figure S2.** Comparison of unsubstituted cesium phosphomolybdate salt and acid (first), and acids or salts containing 1(second), 2 (third), or 3 (fourth) vanadium atoms.

**Figure S3.** DTG/TG curves of unsubstituted and vanadium-substituted cesium phosphomolybdate.

**Figure S4.** Isotherms of nitrogen desorption/ adsorption of unsubstituted and vanadium-substituted cesium phosphomolybdate salts.

**Figure S5.** Diameter and volume of pores of unsubstituted and vanadium-substituted cesium phosphomolybdate salts.

## List of Tables

**Table S1.** Surface area, volume and diameter of pores phosphomolybdic acid and their vanadium-substituted cesium salts.

**Table S2.** Crystallite sizes of phosphomolybdic acid and their vanadium-substituted cesium salts.

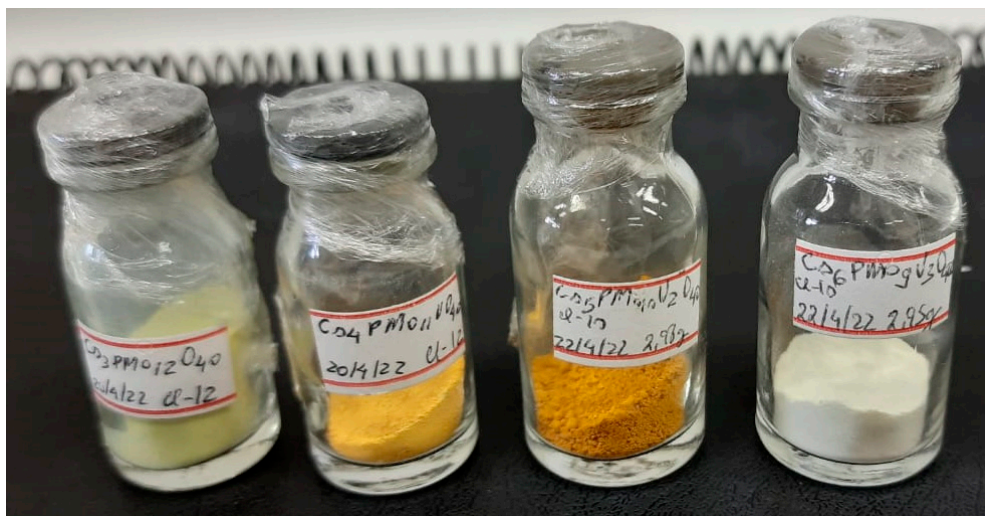

**Figure S1.** Unsubstituted cesium phosphomolybdate (first), and containing 1(second), 2 (third), or 3 (fourth) vanadium atoms.

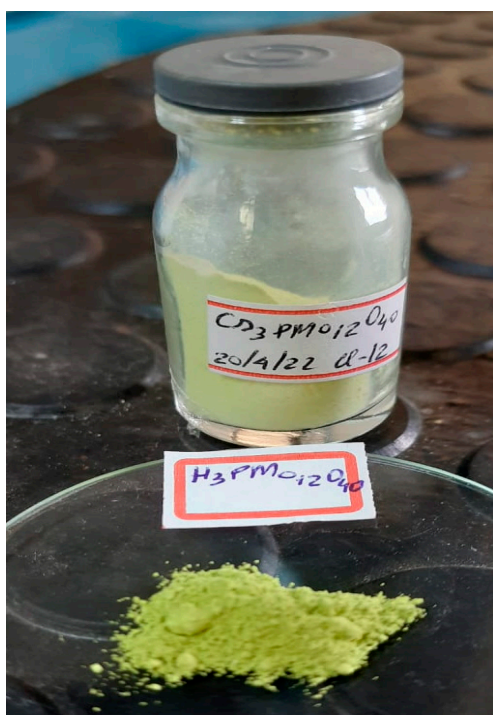

(a)

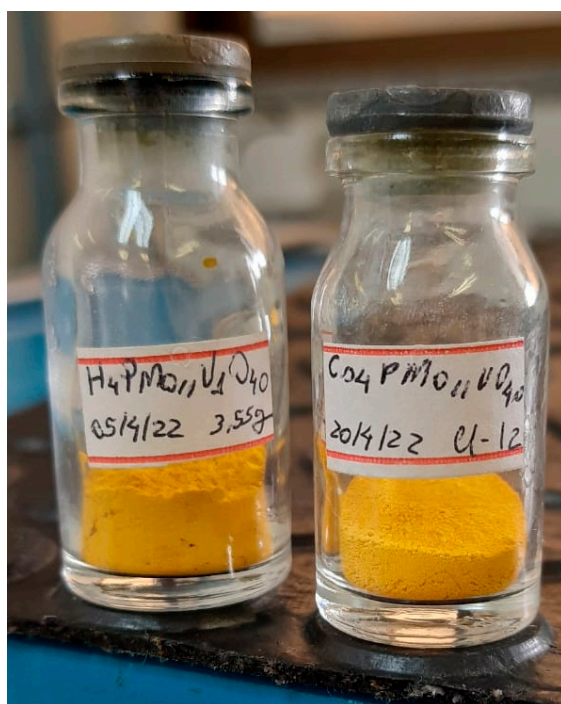

(b)

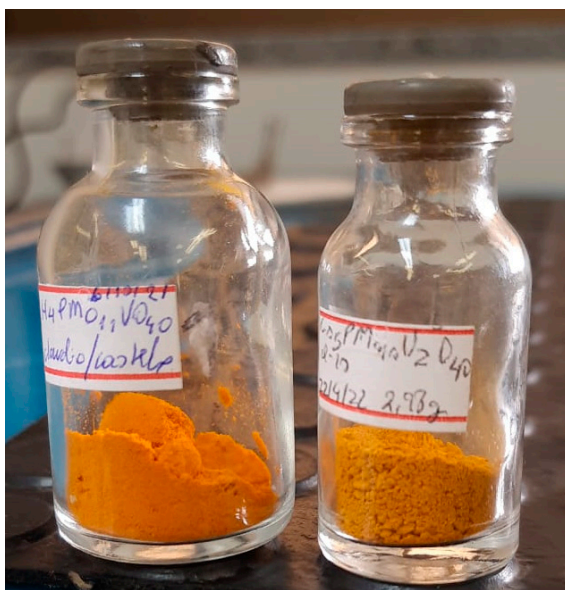

(c)

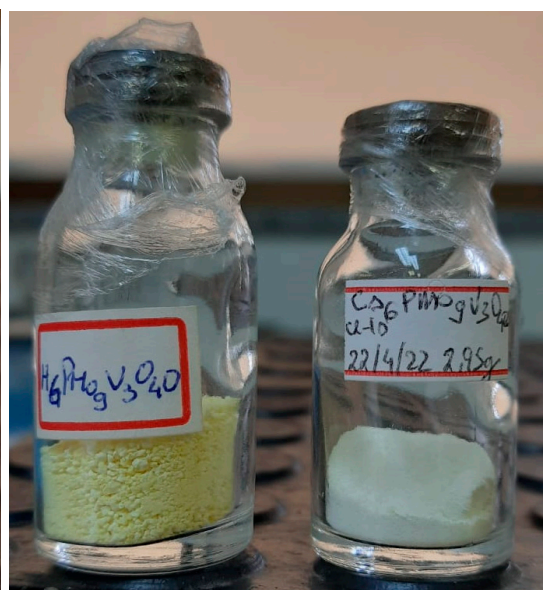

(d)

**Figure S2.** Comparison of unsubstituted cesium phosphomolybdate salt and acid (first) (a), and containing 1(second) (b), 2 (third) (c), or 3 (fourth) (d) vanadium atoms

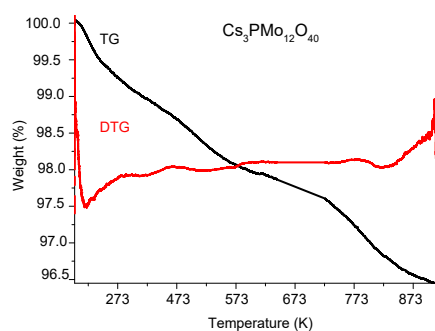

(a)

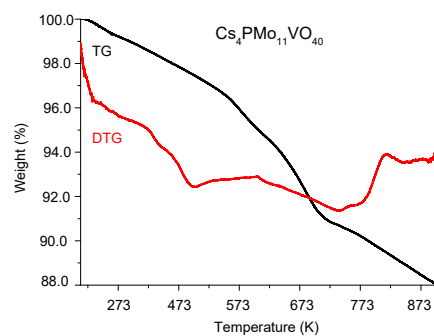

(b)

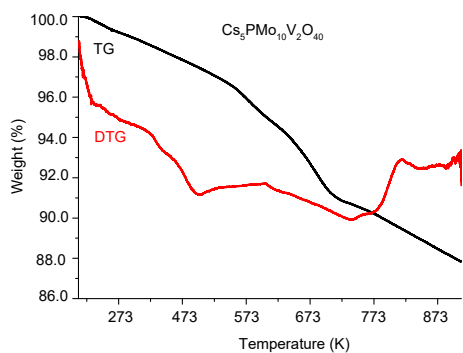

(c)

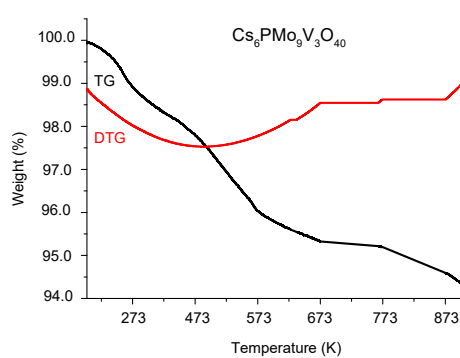

(d)

**Figure S3.** TG/ DTG curves of unsubstituted (a) and vanadium-substituted cesium phosphomolybdate salts (b-d)

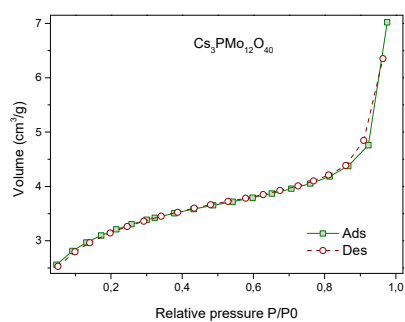

(a)

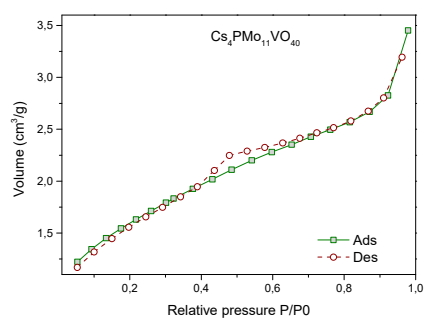

(b)

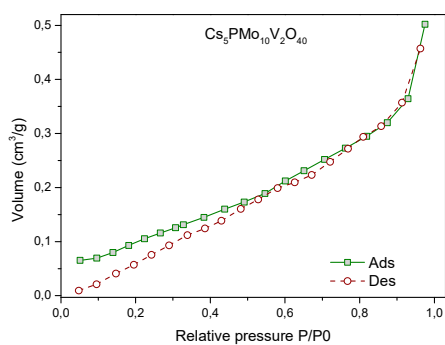

(c)

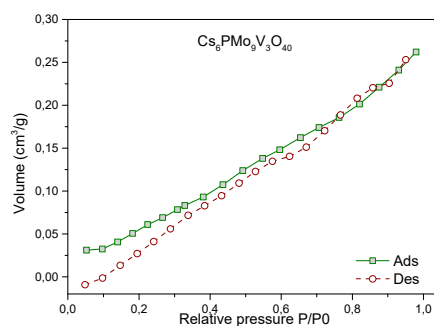

(d)

**Figure S4.** Isotherms of nitrogen desorption/ adsorption of unsubstituted and vanadium-substituted cesium phosphomolybdate salts

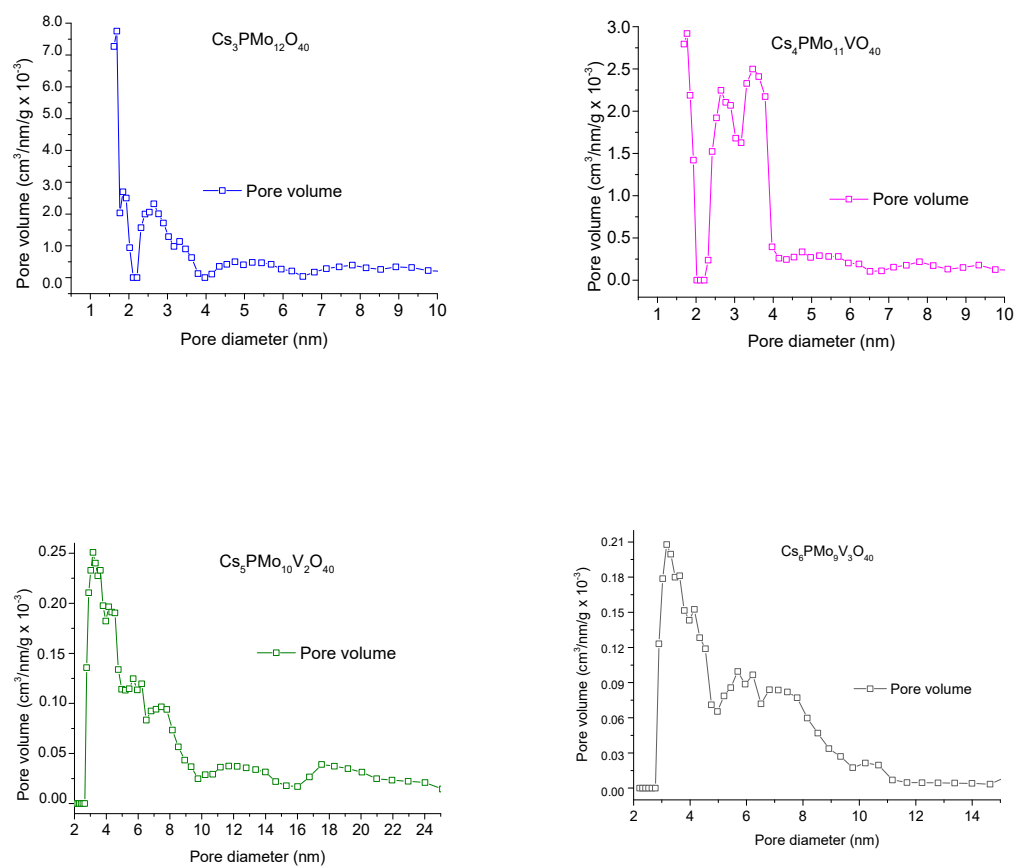

**Figure S5.** Diameter and volume of pores of unsubstituted and vanadium-substituted cesium phosphomolybdate salts

**Table S1.** Surface area, volume and diameter of pores phosphomolybdic acid and their unsubstituted and vanadium-substituted cesium salts

| Catalyst                                                         | Surface area<br>(m <sup>2</sup> g <sup>-1</sup> ) | Pore volume<br>(cm <sup>3</sup> g <sup>-1</sup> ) x 10 <sup>-3</sup> | Pore diameter<br>(Å) |
|------------------------------------------------------------------|---------------------------------------------------|----------------------------------------------------------------------|----------------------|
| H <sub>3</sub> PMo <sub>12</sub> O <sub>40</sub>                 |                                                   |                                                                      |                      |
| Cs <sub>3</sub> PMo <sub>12</sub> O <sub>40</sub>                | 104.1                                             | 37.3                                                                 | 2.0                  |
| Cs <sub>4</sub> PMo <sub>11</sub> VO <sub>40</sub>               | 55.6                                              | 17.4                                                                 | 3.5                  |
| Cs <sub>5</sub> PMo <sub>10</sub> V <sub>2</sub> O <sub>40</sub> | 4.1                                               | 1.0                                                                  | 3.1                  |
| Cs <sub>6</sub> PMo <sub>9</sub> V <sub>3</sub> O <sub>40</sub>  | 2.8                                               | 0.5                                                                  | 3.1                  |

**Table S2.** Crystallite sizes of phosphomolybdic acid and their unsubstituted and vanadium-substituted cesium salts

| Catalyst                                                         | Crystallite size<br>(nm) |
|------------------------------------------------------------------|--------------------------|
| H <sub>3</sub> PMo <sub>12</sub> O <sub>40</sub>                 | 6.95                     |
| Cs <sub>3</sub> PMo <sub>12</sub> O <sub>40</sub>                | 0.15                     |
| Cs <sub>4</sub> PMo <sub>11</sub> VO <sub>40</sub>               | 0.15                     |
| Cs <sub>5</sub> PMo <sub>10</sub> V <sub>2</sub> O <sub>40</sub> | 5.74                     |
| Cs <sub>6</sub> PMo <sub>9</sub> V <sub>3</sub> O <sub>40</sub>  | 0.14                     |
